# Supplementary material
Source: PubMed Central journal article supplement (PMC6298746)

## Supplemental figure legends

**Figure S1. HDACi promote GSK3 $\beta$ -mediated Mcl-1 phosphorylation and apoptosis, but not Mcl-1 degradation, in colon cancer cells.** (A) *Left*, western blotting of Mcl-1 in HCT116 cells treated with control vehicle, 40  $\mu$ M regorafenib, 4  $\mu$ M SAHA, or 5  $\mu$ M MS-275 for 1 hr, and then with 10  $\mu$ g/mL of the translation inhibitor cycloheximide (CHX) at indicated time points; *right*, Mcl-1 expression levels were quantified by the Image J program and normalized to the loading control  $\beta$ -actin. (B) *Mcl-1* mRNA expression in HCT116 cells treated with SAHA or MS-275 as in (A) at the indicated time points was analyzed by real-time RT-PCR. (C) Western blotting of indicated proteins in DLD1 colon cancer cells treated with SAHA or MS-275 as in (A) at indicated time points. (D) Western blotting of indicated proteins in RKO colon cancer cells treated with SAHA or MS-275 as in (A) at indicated time points. (E) HCT116 cells transfected with control scrambled or *GSK3 $\beta$*  siRNA were treated with 4  $\mu$ M SAHA or 5  $\mu$ M MS-275 for 24 hr. *Left*, western blotting of indicated proteins; p-Mcl-1: S159/T163; *right*, apoptosis was analyzed by counting condensed and fragmented nuclei after nuclear staining. (F) DLD1 cells transfected with V5-tagged WT or 4A mutant Mcl-1 (S121A/E125A/S159A/T163A) and treated with 4  $\mu$ M SAHA or 5  $\mu$ M MS-275 for 24 hr. *Upper*, western blotting of transfected Mcl-1; *lower*, analysis of apoptosis as in (E). (G) RKO cells were transfected, treated and analyzed as in (F). In (A), (B), (E), (F) and (G), results were expressed as means  $\pm$  s.d. of three independent experiments. NS,  $P > 0.05$ ; \*,  $P < 0.05$ ; \*\*,  $P < 0.01$ .

**Figure S2. Targeting Mcl-1 phosphorylation sites blocks apoptosis with or without involvement of Mcl-1 degradation.** (A) Schematic representation of the *Mcl-1* genomic locus and the knock-in vector highlighting the putative phosphorylation sites of Mcl-1. (B) Apoptosis in WT and *Mcl-1*-KI HCT116 cells transfected with control scrambled or *Mcl-1* siRNA and treated with 4

$\mu\text{M}$  SAHA or 5  $\mu\text{M}$  MS-275 for 24 hr was analyzed by Annexin V/Propidium Iodide (PI) staining followed by flow cytometry. **(C)** Apoptosis in WT and *Mcl-1*-KI HCT116 cells treated with indicated agents for 48 hr was analyzed by counting condensed and fragmented nuclei after nuclear staining. ABT-263, 5  $\mu\text{M}$ ; ABT-737, 5  $\mu\text{M}$ ; MS-275, 5  $\mu\text{M}$ ; SAHA, 4  $\mu\text{M}$ ; UCN-01, 1  $\mu\text{M}$ ; sunitinib, 15  $\mu\text{M}$ ; sorafenib 20  $\mu\text{M}$ ; regorafenib, 40  $\mu\text{M}$ . Results were expressed as means  $\pm$  s.d. of three independent experiments.

**Figure S3. FBW7 induction determines whether Mcl-1 is degraded in drug-induced apoptosis.**

**(A)** Real-time RT-PCR analysis of *FBW7* mRNA expression in HCT116 cells treated with 4  $\mu\text{M}$  SAHA, 5  $\mu\text{M}$  MS-275, 20  $\mu\text{M}$  sorafenib, or 40  $\mu\text{M}$  regorafenib for 24 hr. **(B)** Real-time RT-PCR analysis of *Mcl-1* mRNA expression in cells treated as in (A). **(C)** Western blotting of FBW7 at the indicated time points in HCT116 cells treated with SAHA or regorafenib as in (A). **(D)** Apoptosis in WT and *FBW7*-KO HCT116 treated with SAHA or MS-275 as in (A) was analyzed by counting condensed and fragmented nuclei after nuclear staining. **(E)** Apoptosis in WT and *FBW7*-KO DLD1 treated with SAHA or MS-275 as in (A) was analyzed as in (D). **(F)** Western blotting of indicated proteins in HCT116 cells transfected with HA-tagged WT FBW7 or indicated mutants (R465C or R505C) and treated with SAHA or MS-275 as in (A). In (A), (B), (D) and (E), results were expressed as means  $\pm$  s.d. of three independent experiments. NS,  $P > 0.05$ ; \*,  $P < 0.05$ ; \*\*,  $P < 0.01$ ; \*\*\*,  $P < 0.001$ .

**Figure S4. HDACi induce multiple BH-only proteins and require Bax for apoptosis induction.**

**(A)-(C)** Real-time RT-PCR analysis of *PUMA* (A), *Bim* (B) and *Noxa* (C) mRNA expression in HCT116 cells treated with SAHA or MS-275 at the indicated time points. **(D)**, **(E) Left**, schematic diagrams of genomic locus and the targeting construct used for knocking out *Bim* (D) and *Noxa* (E) in HCT116 cells. Filled boxes represent exons. Homologous recombination resulted in a deletion

of the exon 2 of *Bim* and a part of the exon 2 of *Noxa*. The same constructs were used in the second round of gene targeting after the *Neo*, flanked by two LoxP sites, was excised from the heterozygous cells by Cre recombinase. The positions of the primers (P1 and P2) for PCR screening are indicated. *Right*, western blots of Bim (D) and Noxa (E) in two KO cell lines (KO1 and KO2) identified.

**Figure S5. HDACi-induced apoptosis is dependent on PUMA, Bim, Noxa and Bax. (A)**

Apoptosis in WT, *PUMA*-KO, *Bim*-KO and *Noxa*-KO HCT116 cells treated with 4  $\mu$ M SAHA or 5  $\mu$ M MS-275 for 24 hr was analyzed by Annexin V/PI staining followed by flow cytometry. (B) MTS analysis of viability of WT (black) and *PUMA*-KO (red) DLD1 cells treated with SAHA at different concentrations for 72 hr. (C) Apoptosis in WT and *BAX*-knockout (*BAX*-KO) HCT116 cells treated with SAHA for 24 hr was analyzed by counting condensed and fragmented nuclei after nuclear staining. \*\*,  $P < 0.01$ . (D) Western blotting of cleaved (C) caspases 3 and 9 in WT and *BAX*-KO HCT116 cells treated with SAHA for 24 hr. In (A), (C) and (D), SAHA: 4  $\mu$ M; MS-275: 5  $\mu$ M. In (B) and (C), results were expressed as means  $\pm$  s.d. of three independent experiments.

**Figure S6. Phosphorylation-dead Mcl-1 binds to PUMA, Bim and Noxa. (A), (B) WT and *Mcl-1*-KI HCT116 cells were treated with 4  $\mu$ M SAHA for 24 hr. Immunoprecipitation (IP) was performed on Noxa (A), or Bim (B), followed by western blotting of indicated proteins. (C) WT and *Mcl-1*-KI HCT116 cells were treated with 5  $\mu$ M MS-275 for 24 hr. Mcl-1 IP was performed followed by western blotting of indicated proteins. (D) HCT116 cells were co-transfected with V5-Mcl-1 (WT or E125A mutant) along with HA-PUMA or HA-Bim. V5 (Mcl-1) IP was performed followed by western blotting of indicated tags.**

**Figure S7. HDACi-induced apoptosis can be restored by Mcl-1 inhibitors in *Mcl-1*-KI cells.**

Apoptosis in WT and *Mcl-1*-KI HCT116 cells treated with 4  $\mu$ M SAHA, 5  $\mu$ M TW-37, 5  $\mu$ M UMI-

77 alone, or the indicated combinations was by analyzed Annexin V/PI staining followed by flow cytometry.

Figure S1

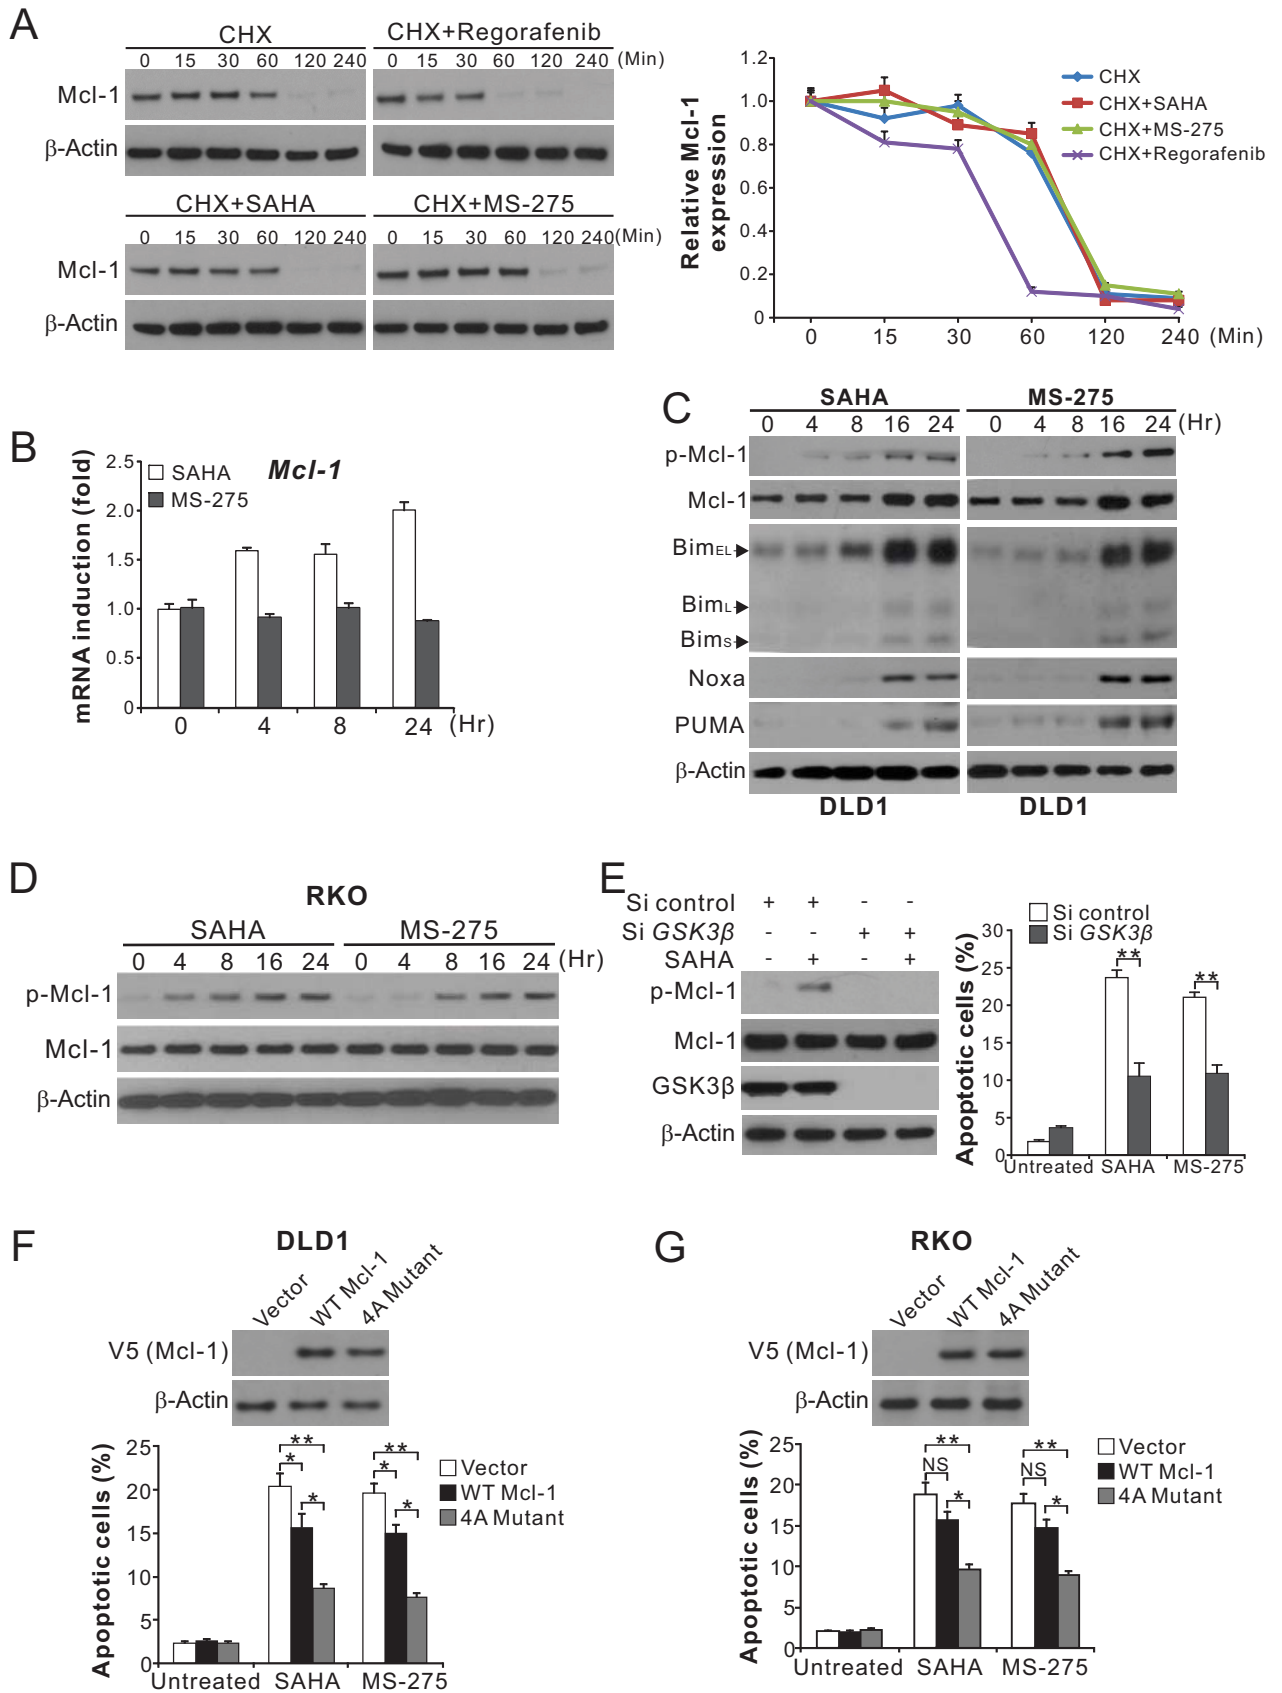

Figure S2

A

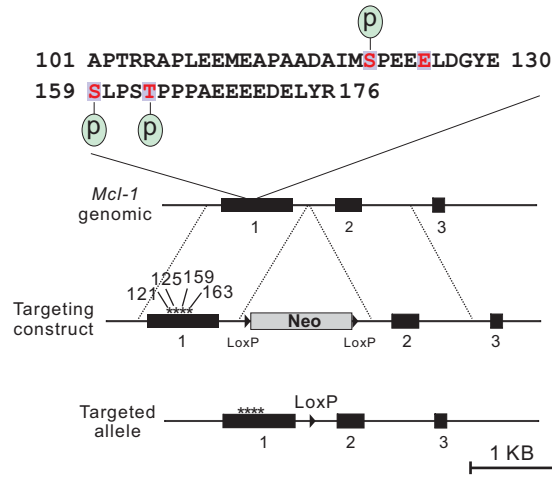

B

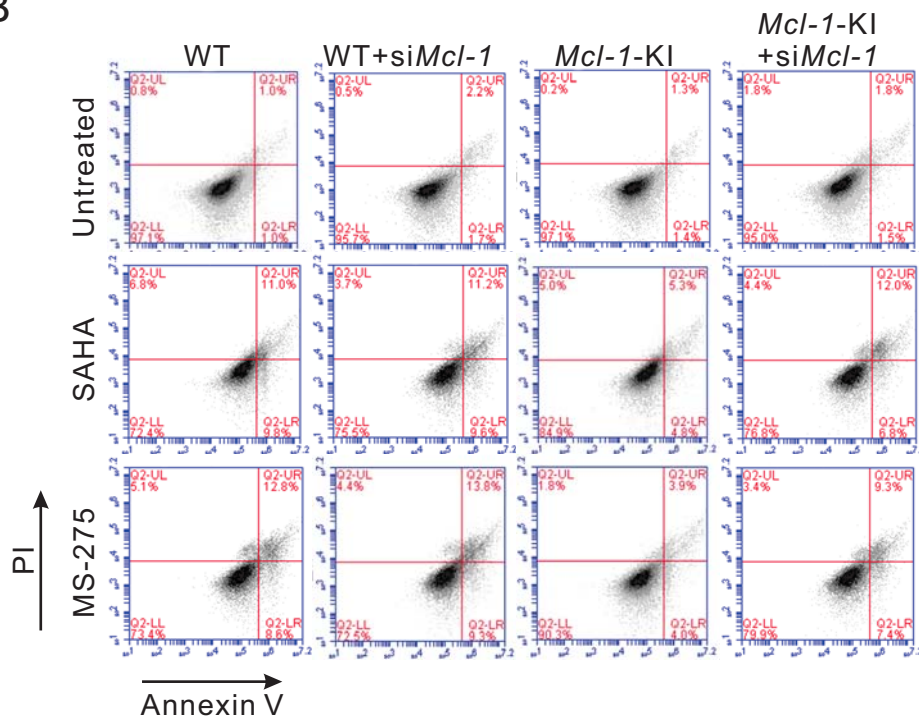

C

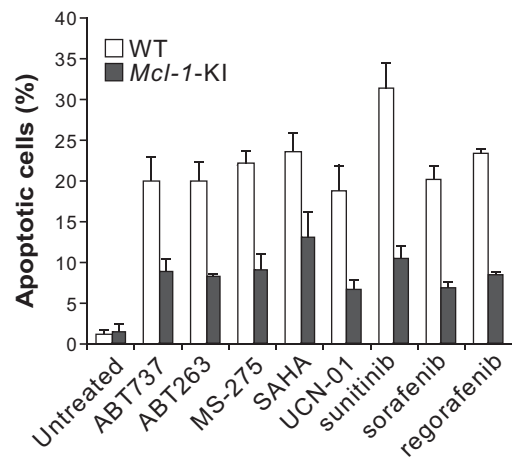



Figure S4

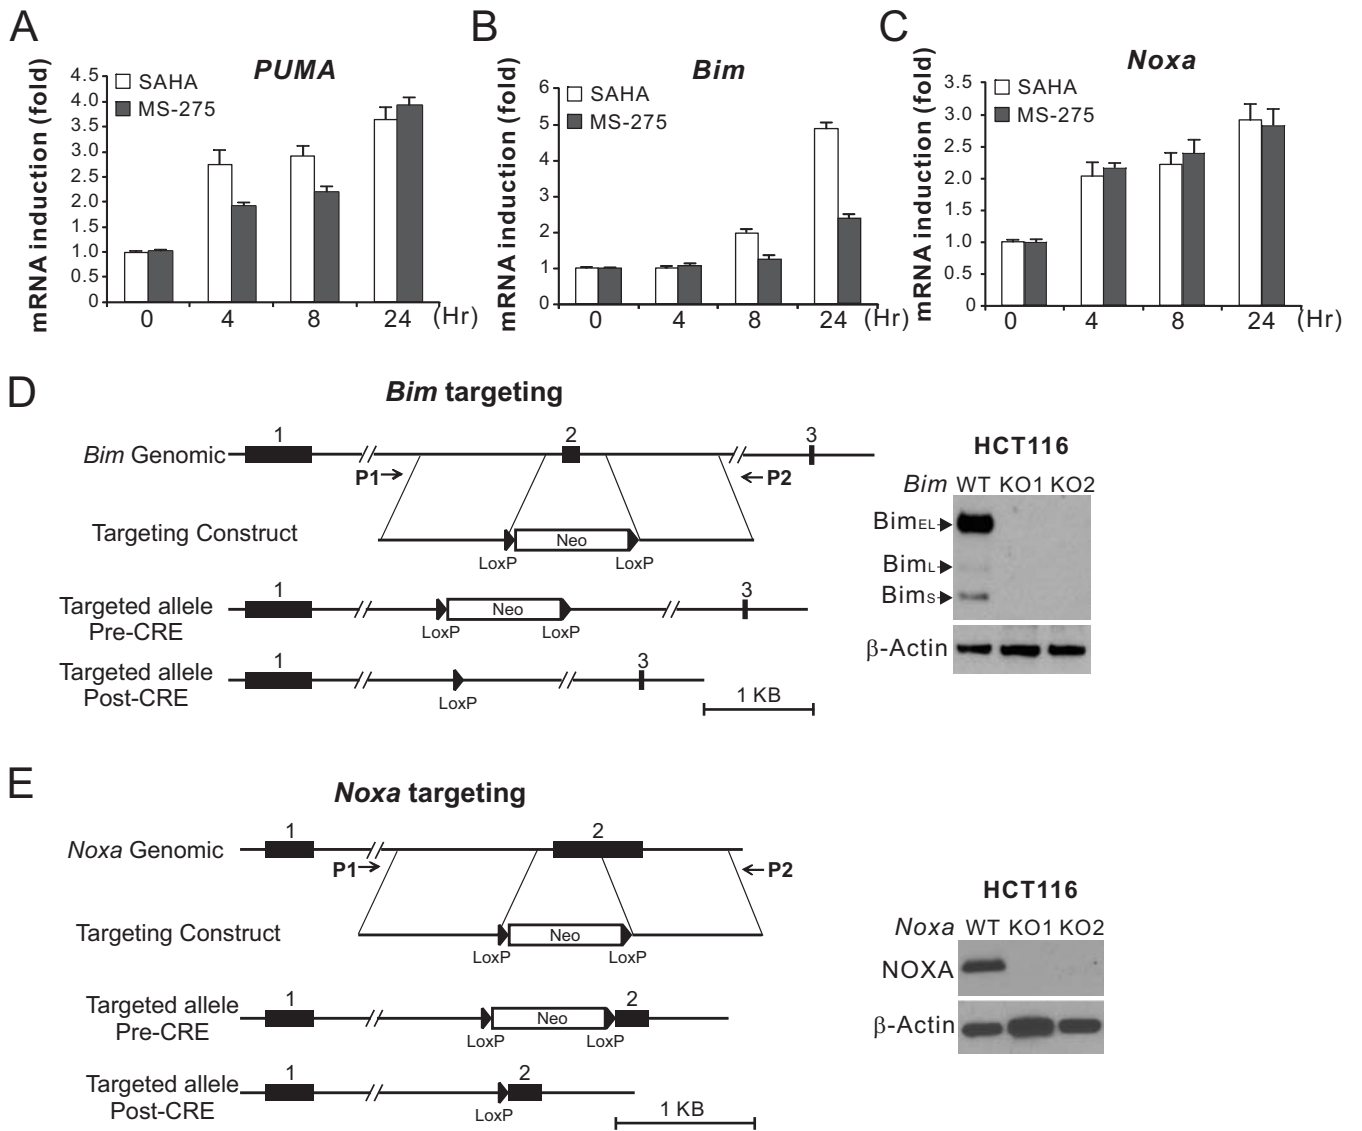



Figure S5

A

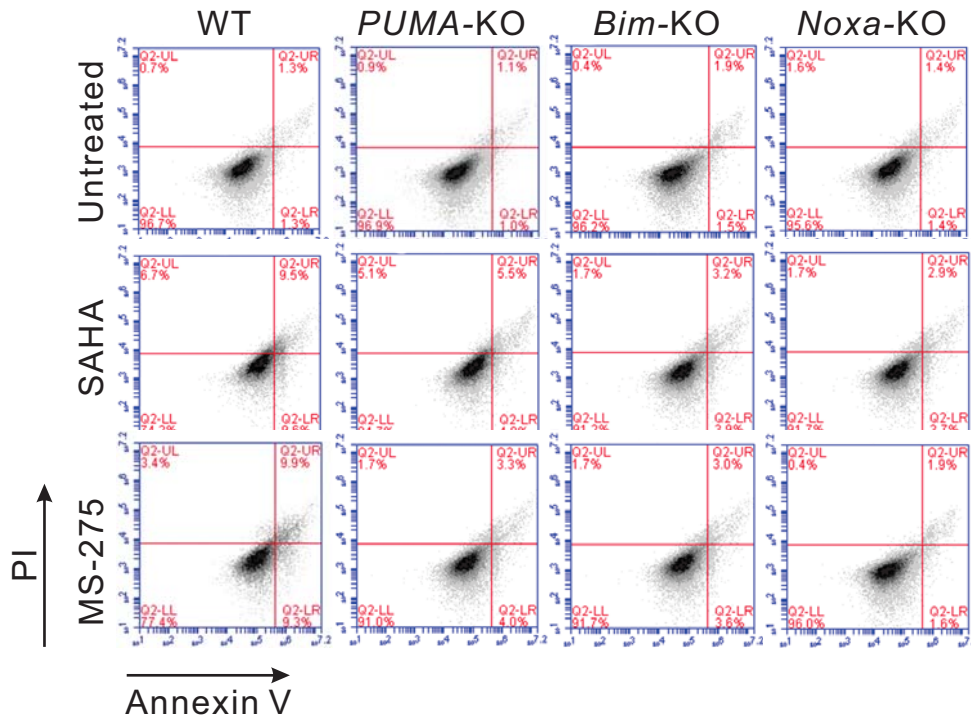

B

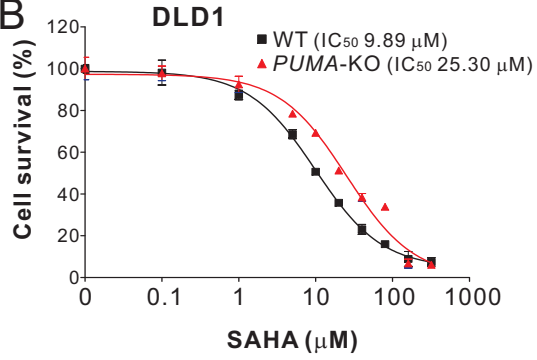

C

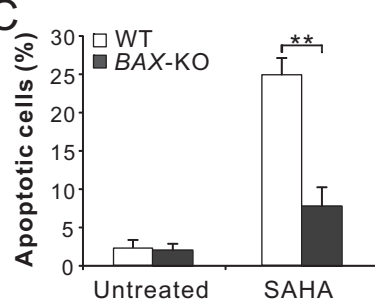

D

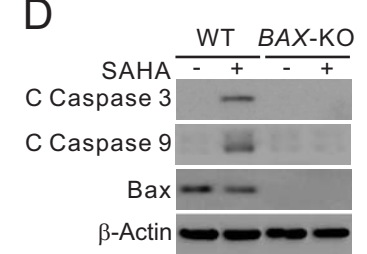

Figure S6

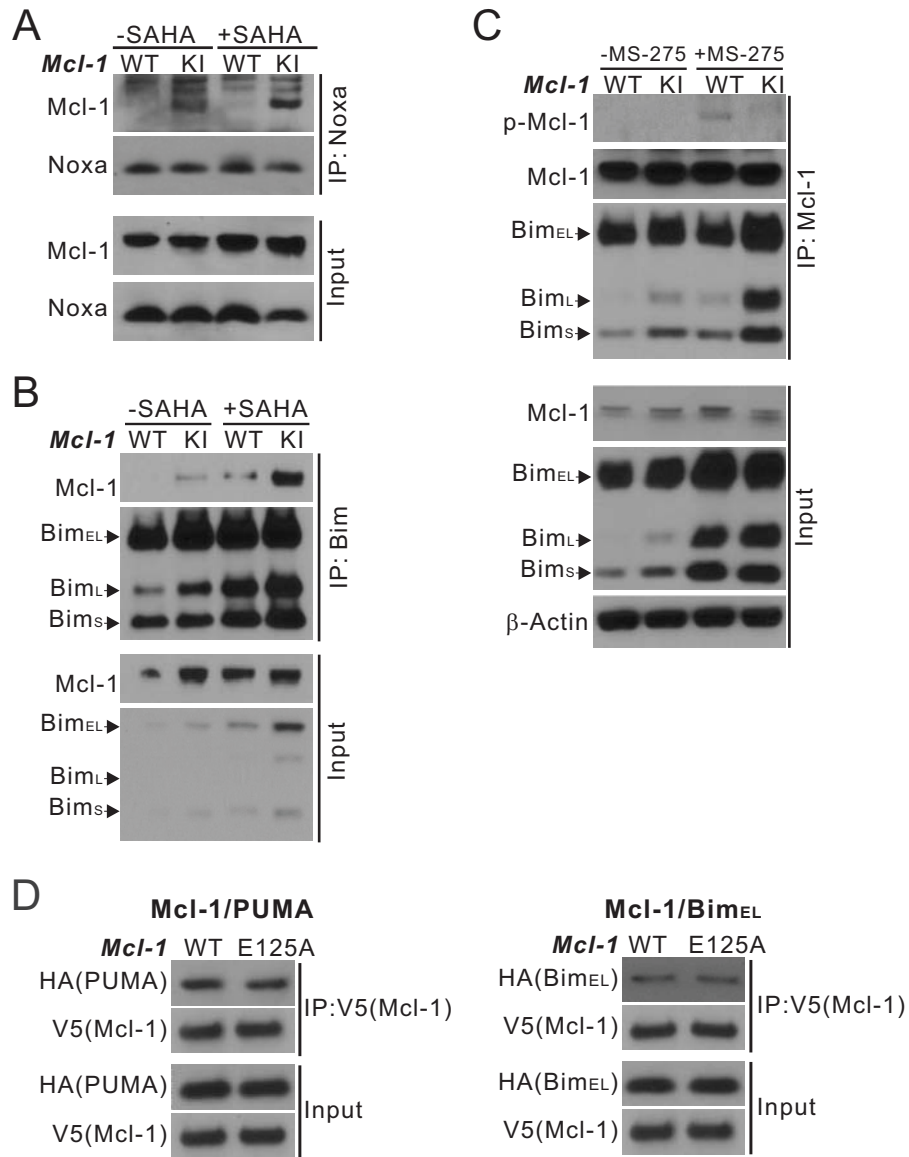

Figure S7

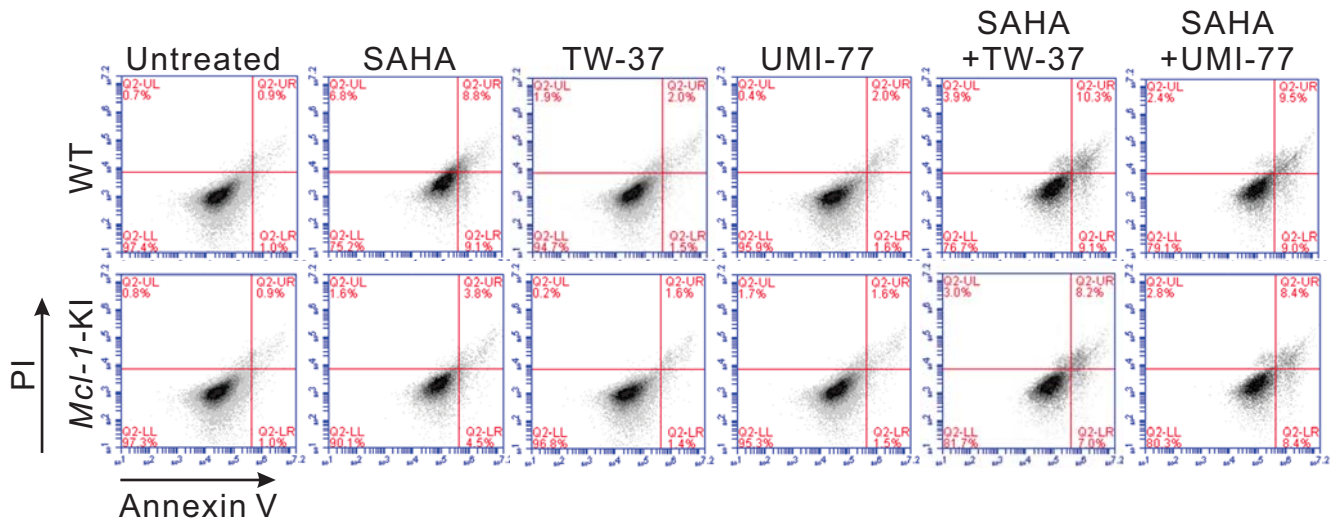

Supplement: NIHMS975826-supplement-1.pdf [file NIHMS975826-supplement-1.pdf]
